# Supplementary material for: Abrupt Photoperiod Changes Differentially Modulate Hepatic Antioxidant Response in Healthy and Obese Rats: Effects of Grape Seed Proanthocyanidin Extract (GSPE)
Source: MDPI journal article supplement (doi:10.3390/ijms242317057), 2023-12-02
Supplement: s1 [file s1]

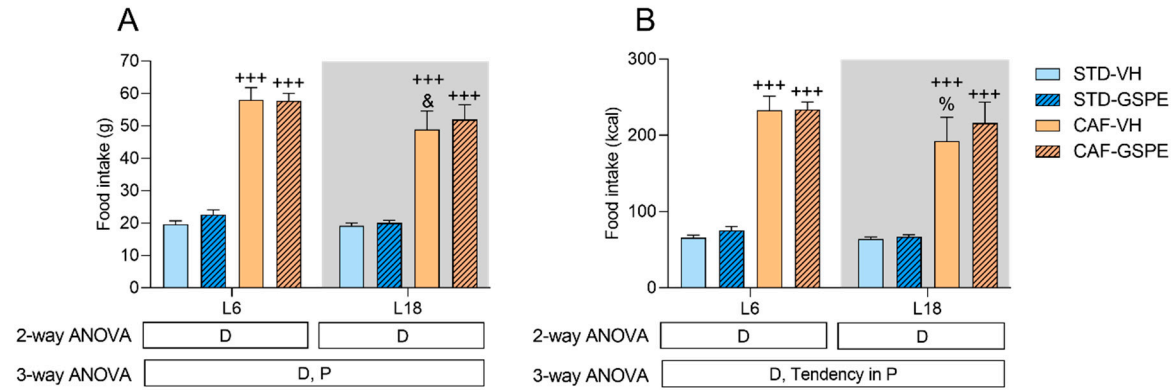

**Figure S1:** Food intake during the 7th week expressed in **(A)** grams and in **(B)** kcal. Values are expressed as the mean  $\pm$  S.E.M. ( $n = 4 - 6$ ) for L6 and L18 conditions. Statistical analyses were performed using 2 and 3-way ANOVA. The letters D and P refer to diet (STD *vs.* CAF) and photoperiod (L6 *vs.* L18) effect, respectively. LSD post-hoc test was used to compare between groups: +++ ( $p < 0.001$ ) indicate differences by diet effect; % ( $0.1 < p < 0.5$ ), & ( $p < 0.05$ ) indicate differences by photoperiod effect. STD indicates Standard diet-fed rats; CAF indicates Cafeteria diet-fed rats; VH indicates rats administered vehicle; GSPE indicates rats were administered with grape seed proanthocyanidin extract at 25 mg/kg b.w.; L6 indicates short photoperiod with 6 h light per day and L18 indicates long photoperiod with 18 h light per day.

**Table S1:** Serum biochemical parameters.

| Parameter             | L6             |                 |               |                | L6<br>ANOVA                 | L18             |                |                   |                   | L18<br>ANOVA             | 3-way<br>ANOVA                      |
|-----------------------|----------------|-----------------|---------------|----------------|-----------------------------|-----------------|----------------|-------------------|-------------------|--------------------------|-------------------------------------|
|                       | STD-VH         | STD-GSPE        | CAF-VH        | CAF-GSPE       |                             | STD-VH          | STD-GSPE       | CAF-VH            | CAF-GSPE          |                          |                                     |
| Cholesterol (mM)      | 2.01 ± 0.13    | 2.01 ± 0.08     | 2.35 ± 0.2    | 2.4 ± 0.24     | Tendency<br>in D            | 2.2 ± 0.1       | 2 ± 0.13       | 3.5 ± 0.33+++&&&  | 2.47 ± 0.11**     | D, T, Tendency<br>in DxT | D, T, P, TxP,<br>Tendency in<br>DxP |
| Triglycerides<br>(mM) | 0.75 ± 0.01    | 0.83 ± 0.06     | 1.6 ± 0.15++  | 1.66 ± 0.11+++ | D                           | 0.82 ± 0.12     | 0.81 ± 0.07    | 2.41 ± 0.26+++&&& | 1.78 ± 0.12++++** | D, Tendency in<br>T, DxT | D, P, DxP,<br>Tendency in<br>TxP    |
| NEFAs (mM)            | 648.93 ± 82.57 | 577.83 ± 116.43 | 685.1 ± 23.16 | 783.34 ± 48.18 | ns                          | 613.13 ± 108.45 | 594.68 ± 85.01 | 804.25 ± 87.4\$   | 942.64 ± 105.01++ | D                        | D, Tendency<br>in DxP               |
| Glucose (mM)          | 7.57 ± 0.12    | 7.52 ± 0.18     | 8.88 ± 0.15++ | 8.92 ± 0.33++  | D                           | 7.82 ± 0.21     | 7.5 ± 0.23     | 9.48 ± 0.17+++    | 9.55 ± 0.63+++    | D                        | D, Tendency<br>in P                 |
| Insulin (mU/L)        | 0.18 ± 0.02    | 0.17 ± 0.02     | 0.31 ± 0.04++ | 0.19 ± 0.01**  | D, T,<br>Tendency<br>in DxT | 0.22 ± 0.03     | 0.18 ± 0.01    | 0.2 ± 0.01&&      | 0.24 ± 0.05\$     | ns                       | D, DxTxP,<br>Tendency in<br>T, TxP  |

Values are expressed as the mean ± S.E.M. ( $n = 5 - 6$ ) for L6 and L18 conditions. Statistical analyses were performed using 2 and 3-way ANOVA. The letters D, T, and P refer to diet (STD *vs.* CAF), treatment (VH *vs.* GSPE), and photoperiod (L6 *vs.* L18) effect, respectively. LSD post-hoc test was used to compare between groups: \$ ( $0.1 < p < 0.5$ ), ++ ( $p < 0.01$ ), and +++ ( $p < 0.001$ ) indicate differences by diet effect; \*\* ( $p < 0.01$ ) indicates differences by treatment effect; && ( $p < 0.01$ ), &&& ( $p < 0.001$ ) indicate differences by photoperiod effect. ns indicates no significance; STD indicates Standard diet-fed rats; CAF indicates Cafeteria diet-fed rats; VH indicates rats administered vehicle; GSPE indicates rats were administered with grape seed proanthocyanidin extract at 25 mg/kg b.w.; L6 indicates short photoperiod with 6 h light per day and L18 indicates long photoperiod with 18 h light per day.

**Table S2:** Liver antioxidant-related metabolites in L6 and L18 conditions, expressed in arbitrary units.

| Metabolites                 | L6                    |                       |                       |                        | L6<br><i>p</i> -value | L18                   |                       |                       |                         | L18<br><i>p</i> -value |
|-----------------------------|-----------------------|-----------------------|-----------------------|------------------------|-----------------------|-----------------------|-----------------------|-----------------------|-------------------------|------------------------|
|                             | STD-VH                | STD-GSPE              | CAF-VH                | CAF-GSPE               |                       | STD-VH                | STD-GSPE              | CAF-VH                | CAF-GSPE                |                        |
| Adenosine                   | 0.12 (0.09 - 0.14)    | 0.17 (0.12 - 0.18)    | 0.2 (0.15 - 0.27)\$   | 0.17 (0.15 - 0.17)     | 0.700                 | 0.2 (0.12 - 0.29)     | 0.16 (0.13 - 0.22)    | 0.14 (0.1 - 0.22)     | 0.14 (0.09 - 0.18)      | 0.743                  |
| Adenosine-5-monophosphate   |                       |                       |                       |                        |                       |                       |                       |                       |                         |                        |
| Adenosine-5-diphosphate     | 0.67 (0.57 - 0.71)    | 0.55 (0.35 - 0.97)    | 0.61 (0.56 - 0.64)    | 0.57 (0.55 - 0.58)     | 0.373                 | 0.58 (0.51 - 0.97)    | 0.57 (0.52 - 0.73)    | 0.74 (0.55 - 0.89)    | 0.64 (0.54 - 0.74)      | 0.916                  |
| Adenosine-5-triphosphate    |                       |                       |                       |                        |                       |                       |                       |                       |                         |                        |
| $\alpha$ -ketoglutaric acid | 0.04 (0.03 - 0.05)    | 0.05 (0.04 - 0.06)    | 0.05 (0.04 - 0.05)    | 0.05 (0.04 - 0.07)     | 0.588                 | 0.04 (0.03 - 0.04)    | 0.04 (0.04 - 0.05)    | 0.05 (0.05 - 0.06)++% | 0.04 (0.03 - 0.05)      | 0.042                  |
| Aspartic acid               | 0.82 (0.8 - 0.92)     | 0.89 (0.78 - 1)       | 0.92 (0.81 - 1.15)    | 1.04 (0.98 - 1.12)     | 0.328                 | 0.8 (0.73 - 0.9)      | 0.84 (0.77 - 0.86)    | 1.04 (0.83 - 1.31)    | 1.07 (0.89 - 1.28)      | 0.855                  |
| Citric acid                 | 0.39 (0.33 - 0.51)    | 0.34 (0.3 - 0.35)     | 0.36 (0.25 - 0.48)    | 0.41 (0.32 - 0.74)     | 0.483                 | 0.28 (0.18 - 0.33)    | 0.25 (0.24 - 0.33)    | 0.32 (0.26 - 0.34)    | 0.32 (0.3 - 0.41)       | 0.617                  |
| Fumaric acid                | 14.2 (12.87 - 15.7)   | 16.33 (14.62 - 17.53) | 11.89 (10.75 - 14.28) | 12.46 (10.72 - 16.07)  | 0.374                 | 12.6 (9.95 - 13.91)   | 12.26 (11.17 - 13.24) | 13.5 (12.69 - 14.41)  | 12.9 (9.85 - 14.51)     | 0.767                  |
| Glucose 6-phosphate         | 0.06 (0.04 - 0.08)    | 0.04 (0.03 - 0.05)    | 0.05 (0.05 - 0.06)    | 0.04 (0.04 - 0.05)     | 0.352                 | 0.04 (0.04 - 0.05)    | 0.04 (0.03 - 0.05)    | 0.04 (0.04 - 0.06)    | 0.04 (0.03 - 0.05)      | 0.406                  |
| Glutamic acid               | 4.23 (2.84 - 4.45)    | 4.45 (3.88 - 5.26)    | 4.76 (4.27 - 4.93)    | 4.43 (4.38 - 4.5)      | 0.355                 | 4.27 (3.16 - 5.2)     | 3.46 (2.88 - 4.07)    | 6.46 (5.75 - 7.37)++% | 5.89 (4.88 - 6.92)+     | 0.168                  |
| Glycine                     | 2.59 (2.49 - 2.79)    | 2.65 (2.57 - 3.04)    | 3.39 (2.79 - 3.57)\$  | 2.89 (2.86 - 3.02)     | 0.230                 | 2.76 (2.22 - 3.11)    | 2.38 (2.25 - 2.55)    | 3.79 (3.01 - 3.88)\$  | 2.77 (2.65 - 3.01)\$    | 0.395                  |
| Hydroxyphenyllactic acid    | 0.35 (0.32 - 0.47)    | 0.41 (0.33 - 0.47)    | 0.32 (0.23 - 0.34)    | 0.26 (0.1 - 0.31)+     | 0.235                 | 0.5 (0.41 - 0.52)     | 0.43 (0.38 - 0.45)    | 0.22 (0.15 - 0.25)+   | 0.32 (0.25 - 0.32)+     | 0.234                  |
| Inosine                     | 0.25 (0.19 - 0.54)    | 0.34 (0.27 - 0.43)    | 0.35 (0.28 - 0.48)    | 0.28 (0.26 - 0.32)     | 0.678                 | 0.3 (0.25 - 0.34)     | 0.28 (0.21 - 0.33)    | 0.37 (0.29 - 0.47)    | 0.3 (0.25 - 0.32)       | 0.202                  |
| Inosine 5-monophosphate     | 0.05 (0.05 - 0.05)    | 0.04 (0.02 - 0.06)    | 0.06 (0.06 - 0.07)+   | 0.05 (0.05 - 0.06)*    | 0.066                 | 0.04 (0.04 - 0.06)    | 0.04 (0.04 - 0.05)    | 0.08 (0.06 - 0.1)+    | 0.06 (0.06 - 0.07)\$    | 0.490                  |
| Leucine                     | 0.86 (0.71 - 0.99)    | 0.97 (0.84 - 1.08)    | 0.87 (0.77 - 1.03)    | 0.78 (0.71 - 0.85)     | 0.911                 | 1.11 (0.96 - 1.14)    | 0.88 (0.84 - 0.91)    | 1.05 (0.7 - 1.13)\$   | 0.78 (0.71 - 0.9)       | 0.049                  |
| Malic acid                  | 4.8 (4.43 - 5.15)     | 4.6 (4.15 - 6.11)     | 3.66 (3.26 - 4.13)+   | 4.37 (4.02 - 4.97)     | 0.127                 | 4.07 (3.01 - 5.18)    | 4.01 (3.59 - 4.36)    | 4.46 (3.53 - 5.38)    | 4.53 (3.86 - 4.76)      | 0.701                  |
| Methionine                  | 1.12 (1.11 - 1.16)    | 1.17 (1.11 - 1.2)     | 1.05 (1.03 - 1.14)    | 1.08 (1.05 - 1.14)+    | 0.224                 | 1.16 (1.09 - 1.17)    | 1.15 (1 - 1.16)       | 1.11 (1.04 - 1.12)    | 1.08 (1.05 - 1.09)      | 0.315                  |
| myo-Inositol                | 0.31 (0.26 - 0.38)    | 0.33 (0.31 - 0.39)    | 0.3 (0.25 - 0.31)     | 0.25 (0.23 - 0.28)     | 0.598                 | 0.35 (0.26 - 0.43)    | 0.3 (0.29 - 0.35)     | 0.32 (0.23 - 0.35)    | 0.27 (0.25 - 0.34)      | 0.528                  |
| Nicotinamide                | 0.53 (0.49 - 0.86)    | 0.71 (0.64 - 0.75)    | 0.72 (0.63 - 0.87)    | 0.69 (0.6 - 0.86)      | 0.683                 | 0.69 (0.56 - 0.93)    | 0.64 (0.6 - 0.82)     | 0.69 (0.55 - 0.91)    | 0.55 (0.54 - 0.59)      | 0.393                  |
| Phenylalanine               | 0.37 (0.29 - 0.42)    | 0.37 (0.37 - 0.41)    | 0.37 (0.34 - 0.44)    | 0.35 (0.32 - 0.36)     | 0.931                 | 0.45 (0.41 - 0.47)    | 0.35 (0.33 - 0.38)#   | 0.46 (0.31 - 0.49)    | 0.32 (0.31 - 0.4)       | 0.046                  |
| Phosphoric acid             | 44.73 (41.18 - 46.16) | 44.9 (43.59 - 46.49)  | 46.67 (46.63 - 48.13) | 45.77 (43.95 - 47.4)   | 0.732                 | 44.5 (40.51 - 47.46)  | 44.91 (43.51 - 45.23) | 47.33 (42.1 - 49.51)  | 43.16 (41.16 - 44.78)   | 0.312                  |
| Proline                     | 2.33 (1.82 - 2.55)    | 2.47 (2.12 - 2.8)     | 2.79 (2.46 - 3.08)    | 2.61 (2.29 - 2.64)     | 0.546                 | 2.88 (2.57 - 2.98)    | 2.43 (2.16 - 2.96)    | 3.59 (2.41 - 3.88)    | 2.79 (2.52 - 3.38)      | 0.963                  |
| Pyruvic acid                | 0.55 (0.51 - 0.63)    | 0.59 (0.47 - 0.64)    | 0.67 (0.48 - 0.78)    | 0.64 (0.55 - 0.7)      | 0.543                 | 0.77 (0.67 - 0.91)%   | 0.73 (0.67 - 0.81)    | 0.92 (0.54 - 1.11)    | 0.9 (0.6 - 1.06)        | 0.916                  |
| Ribose-5-phosphate          | 0.04 (0.03 - 0.04)    | 0.04 (0.03 - 0.04)    | 0.04 (0.04 - 0.04)    | 0.04 (0.04 - 0.04)     | 0.779                 | 0.05 (0.04 - 0.05)%   | 0.04 (0.04 - 0.04)    | 0.04 (0.03 - 0.05)    | 0.03 (0.03 - 0.05)      | 0.531                  |
| Sarcosine                   | 0.03 (0.02 - 0.03)    | 0.03 (0.02 - 0.03)    | 0.01 (0.01 - 0.02)+   | 0.01 (0.01 - 0.02)+    | 0.009                 | 0.04 (0.03 - 0.04)&   | 0.03 (0.03 - 0.04)&   | 0.01 (0.01 - 0.02)++  | 0.01 (0.01 - 0.02)++    | 0.000                  |
| Serine                      | 0.81 (0.56 - 0.99)    | 1.03 (0.98 - 1.03)    | 2.39 (1.94 - 3.22)++  | 2.33 (1.88 - 2.58)\$   | 0.014                 | 0.64 (0.51 - 0.97)    | 0.53 (0.45 - 0.83)&   | 3.7 (3.34 - 3.81)++&  | 2.09 (1.49 - 2.79)+++   | 0.181                  |
| Stearic acid                | 15.41 (13.05 - 18.6)  | 14.15 (13.19 - 14.78) | 21.19 (16.79 - 22.64) | 19.49 (17.53 - 24.53)+ | 0.555                 | 13.52 (12.45 - 16.95) | 13.77 (12.32 - 14.38) | 17.42 (15.9 - 19.18)  | 17.73 (15.64 - 21.45)\$ | 0.117                  |

|           |                    |                    |                    |                    |       |                    |                    |                      |                      |       |
|-----------|--------------------|--------------------|--------------------|--------------------|-------|--------------------|--------------------|----------------------|----------------------|-------|
| Taurine   | 4.57 (3.45 - 6.41) | 3.5 (2.55 - 3.73)  | 3.13 (1.81 - 3.88) | 4.53 (1.48 - 6.44) | 0.507 | 5.84 (2.69 - 6.95) | 7.5 (6.23 - 7.81)& | 1.62 (1.14 - 3.05)+  | 3.08 (2.75 - 4.84)\$ | 0.364 |
| Threonine | 2.91 (2.69 - 3)    | 2.75 (2.51 - 2.91) | 2.7 (2.59 - 2.83)  | 2.83 (2.69 - 2.97) | 0.248 | 2.6 (2.53 - 2.66)% | 2.6 (2.51 - 2.68)  | 2.75 (2.63 - 2.85)\$ | 2.72 (2.71 - 2.81)\$ | 0.134 |

Values are expressed as the median (interquartile range, IQR) in arbitrary units. Statistical analyses were performed using Kruskal-Wallis' test. Mann-Whitney U test was used to compare between groups: \$ ( $0.1 < p < 0.5$ ), + ( $p < 0.05$ ), and ++ ( $p < 0.01$ ) indicate differences by diet effect; # ( $0.1 < p < 0.5$ ), \* ( $p < 0.05$ ), and \*\* ( $p < 0.01$ ) indicates differences by treatment effect; % ( $0.1 < p < 0.5$ ) and & ( $p < 0.05$ ) indicate differences by photoperiod effect. STD indicates Standard diet-fed rats; CAF indicates Cafeteria diet-fed rats; VH indicates rats administered vehicle; GSPE indicates rats administered 25 mg/kg BW grape seed proanthocyanidin extract; L6 indicates short photoperiod with 6 h light per day and L18 indicates long photoperiod with 18 h light per day.
